# Supplementary material for: Simulation and risk assessment of typical antibiotics in the multi-media environment of the Yangtze River Estuary under tidal effect
Source: Research Square preprint supplement (doi:10.21203/rs.3.rs-1413577/v1), 2022-03-16
Supplement: Supplementary file 1 [file ae59583c4ddeae78337380f4.docx]

**Simulation and risk assessment of typical antibiotics in the multi-media environment of the Yangtze River Estuary under tidal effect**

Chaomeng Daia, Yueming Hana, Yan Lia, Yanping Duanb, c *, Shuguang Liua, Yalei Zhangd, Yaojen Tub,c

a College of Civil Engineering, Tongji University, 1239 Siping Road, Shanghai 200092, P.R. China

b Institute of Urban Studies, School of Environmental and Geographical Sciences, Shanghai Normal University, 100 Guilin Rd., Shanghai 200234, P.R. China

c Yangtze River Delta Urban Wetland Ecosystem National Field Observation and Research Station, Shanghai 200234, China

d School of Environmental Science and Engineering, Tongji University, 1239 Siping Road, Shanghai 200092, P.R. China

* Corresponding author:

phone: 86-21-64322753, e-mail: duanyanping@shnu.edu.cn (Yanping Duan);

**Table S1 Environmental parameters of the study area**

| symbol | definition | Study area values | Reference | symbol | definition | Study area values | Reference |
| --- | --- | --- | --- | --- | --- | --- | --- |
| A2 | Freshwater area(m2) | 2.84E+09 | * | X23 | Solid volume fraction in Freshwater | 1.67E-04 | (Zhang et al., 2014) |
| A3 | Seawater area(m2) | 2.34E+09 | * | X33 | Solid volume fraction in seawater | 1.67E-04 | (Zhang et al., 2014) |
| A4 | Soil area(m2) | 5.77E+09 | * | O53 | Proportion of solid organic carbon in sediments | 1.98E-02 | (Zhang et al., 2015a) |
| A5 | Sediment area(m2) | 2.84E+09 | * | O63 | Proportion of solid organic carbon in groundwater | 3.72E-02 | (Zhang et al., 2015a) |
| A6 | Groundwater area(m2) | 5.99E+09 | * | Qt | advection velocity(m3/h) | 2.47E+06 | (Zhang et al., 2014) |
| h2 | depth of Freshwater(m) | 8.32 | (Zhang et al., 2015a) | T | Temperature(K) | 2.89E+02 | (Zhang et al., 2014) |
| h3 | depth of seawater(m) | 7 | (Zhang et al., 2015a) | Kw | Rainfall rate(m/h) | 1.20E-04 | (Zhang et al., 2015a) |

*Access to remote sensing image data

**Table S2 Toxicological data of six antibiotics on algae in freshwater**

|  | CAS | *EC50*(mg/L) | *AF* | *PNEC* (ng/L) |
| --- | --- | --- | --- | --- |
| OTC | 79-57-2 | 0.110 | 1000 | 110.0 |
| TC | 60-54-8 | 0.090 | 1000 | 90.0 |
| NOR | 70458-96-7 | 0.038 | 1000 | 38.0 |
| OFX | 82419-36-1 | 0.018 | 1000 | 18.0 |
| ETM | 114-07-8 | 0.020 | 1000 | 20.0 |
| AMOX | 26787-78-0 | 0.0037 | 1000 | 3.7 |

**Table S3 Toxicological data of six antibiotics on algae in soil**

|  | CAS | *EC50*(mg/kg) | *AF* | *PNEC*/(ng/g) |
| --- | --- | --- | --- | --- |
| OTC | 79-57-2 | 415.00 | 1000 | 743.00 |
| TC | 60-54-8 | 170.00 | 1000 | 305.00 |
| NOR | 70458-96-7 | 1.23 | 1000 | 2.20 |
| OFX | 82419-36-1 | 1.11 | 1000 | 2.00 |
| ETM | 114-07-8 | 0.015 | 1000 | 0.034 |
| AMOX | 26787-78-0 | - | - | - |

**Table S4 DWI and BW of different age groups**

| Age | *BW*/kg | *DWI*/(L/d) | Age | *BW*/kg | *DWI*/(L/d) |
| --- | --- | --- | --- | --- | --- |
| 0-3 M | 5.6 | 1.15 | 3-6 Y | 19 | 1.16 |
| 3-6 M | 7.2 | 1.14 | 6-11 Y | 36 | 1.55 |
| 6-12 M | 9.4 | 1.18 | 11-16 Y | 56 | 1.90 |
| 1-2 Y | 12.0 | 0.85 | 16-18 Y | 57 | 1.77 |
| 2-3 Y | 13.8 | 0.83 | Adult | 60 | 2.04 |

**Table S5 ADI and HQ of different age groups**

|  | *ADI*  [μg/(kg·d)] | *HQ* | | | |  | |  |
| --- | --- | --- | --- | --- | --- | --- | --- | --- |
| 0-3 M | 3-6 M | 6-12 M | 1-2 Y | | 2-3 Y | | |
| OTC | 30 | 1.38E-06 | 1.06E-06 | 8.44E-07 | 4.76E-07 | | 4.04E-07 | | |
| TC | 30 | 1.18E-05 | 9.12E-06 | 7.23E-06 | 4.08E-06 | | 3.46E-06 | | |
| NOR | 2 | 9.46E-05 | 7.3E-05 | 5.78E-05 | 3.26E-05 | | 2.77E-05 | | |
| OFX | 150 | 1.71E-08 | 1.32E-08 | 1.04E-08 | 5.89E-09 | | 5E-09 | | |
| ETM | 40 | 4.09E-08 | 3.15E-08 | 2.5E-08 | 1.41E-08 | | 1.2E-08 | | |
|  | *ADI*  [μg/(kg·d)] | 3-6 Y | 6-11 Y | 11-16 Y | 16-18 Y | | Adult | | |
| OTC | 30 | 4.1E-07 | 2.89E-07 | 2.28E-07 | 2.09E-07 | | 2.28E-07 | | |
| TC | 30 | 3.52E-06 | 2.48E-06 | 1.95E-06 | 1.79E-06 | | 1.96E-06 | | |
| NOR | 2 | 2.81E-05 | 1.98E-05 | 1.56E-05 | 1.43E-05 | | 1.57E-05 | | |
| OFX | 150 | 5.08E-09 | 3.58E-09 | 2.82E-09 | 2.58E-09 | | 2.83E-09 | | |
| ETM | 40 | 1.22E-08 | 8.58E-09 | 6.76E-09 | 6.19E-09 | | 6.77E-09 | | |

**6Table S5 Number of resident population and scale of animal farming in the study area**

| Year | Pig  （104） | Poultry（104） | Permanent population（104） | Rural population（104） | Urban population（104） |
| --- | --- | --- | --- | --- | --- |
| 2011 | 267.00 | 4300.00 | 2135.77 | 311.18 | 1824.59 |
| 2012 | 241.64 | 3650.00 | 2165.80 | 289.70 | 1876.10 |
| 2013 | 241.84 | 2642.00 | 2197.65 | 283.50 | 1914.15 |
| 2014 | 243.13 | 2166.00 | 2206.75 | 271.56 | 1935.19 |
| 2015 | 201.37 | 1944.00 | 2197.65 | 260.09 | 1937.56 |
| 2016 | 171.11 | 1713.00 | 2201.29 | 256.67 | 1944.62 |
| 2017 | 111.72 | 1252.00 | 2200.38 | 253.58 | 1946.80 |
| 2018 | 148.86 | 984.00 | 2204.93 | 241.56 | 1963.37 |
| 2019 | 117.00 | 844.00 | 2209.48 | 230.00 | 1979.48 |

**7 Table S2 Calculation expression of Z value**

| Main phase | Sub phase | Z values |
| --- | --- | --- |
| Air | Gas phase | *ZA=1/RT* |
|  | Suspended particulate | *ZAP=ZA×6×106/PLS* |
|  | Total phase | *ZAB=ZAP×γAP* |
| Surface water | Water body | *ZW=1/H* |
|  | Suspended particulate | *ZPW=ZW×ρPW×KOC×foc,pw* |
|  | Total phase | *ZBw=ZPw×γPw* |
| Soil | Solid phase | *ZS=ZW×ρS×0.14KOW×foc,S* |
| Sediment | Solid phase | *ZSed=ZW×ρsed×0.14KOW×foc,sed* |
|  | Total phase | *Zbsed=Zw×γw+Zsed×γsed* |
| Groundwater | Total phase | *ZGW=ZW×KGW-W* |

symbolic meaning as shown in Table S9

**Table S8 Calculation expression of D value**

| Process | Phase | D values |
| --- | --- | --- |
| Advection | Air-Outside | *D0-a=Q0-a(t)×Za* |
|  | Water-Outside | *D0-w=Q0-w(t)×Zsw* |
| Diffusion | Air-Freshwater | *D12=A2/(1/(K21×Z11)+1/(K21×Z22))* |
|  | Freshwater-Air | *D21=A2/(1/(K12×Z11)+1/(K21×Z22))* |
|  | Air-Seawater | *D13=A3/(1/(K13×Z11)+1/(K31×Z33))* |
|  | Seawater-Air | *D31=A3/(1/(K13×Z11)+1/(K31×Z33))* |
|  | Air-Soil | *D14=A4/(1/(K14×Z11)+L3/(B1×Z11+B2×Z22))* |
|  | Soil-Air | *D41=A4/(1/(K14×Z11)+L3/(B1×Z11+B2×Z22))* |
|  | Water-Sediment | *D25=A5/(1/(K25×Z22)+L5/(B5×Z22))* |
| Degradation | Air | *Dr1=Km1×A1×h1×Z1* |
|  | Freshwater | *Dr2=Km2×A2×h2×(Z2-X2f×Z2f)* |
|  | Seawater | *Dr3=Km3×A3×h3×Z3* |
|  | Soil | *Dr4=Km4×A4×h4×Z4* |
|  | Sediment | *Dr5=Km5×A5×h5×Z5* |
|  | Groundwater | *Dr6=Km6×A6×h6×Z6* |
| Others | Sediment resuspension | *D52=A5/(1/(K25×Z22)+L5/(B5×Z22))* |
|  | Air-Water dry deposition | *D12=A2×Kp×X13×Z13* |
|  | Air-Water wet deposition | *D12=A2×Kw×Sc×X13×Z13* |
|  | Air-Soil dry deposition | *D14=A4×Kp×X13×Z13* |
|  | Air-Soil wet deposition | *D14=A4×Kw×Sc×X13×Z13* |
|  | Water-Sediment deposition | *D25=A5×Ks×Z23* |
|  | Sediment-Water resuspension | *D52=A5×Kr×Z53* |
|  | Particle erosion | *D42=A4×Ke×Z33* |
|  | Normal erosion | *D42=A4×Kl×Z22* |
|  | Biological concentration | *D2f=Yf×Z2f/f* |

symbolic meaning as shown in **Table S2** and **Table S4**

**Table S9 Symbolic notes used in the paper**

| Symbol | Means |
| --- | --- |
| *D* | Transport parameters |
| *Dri* | Degradation coefficient of phase i |
| *D10t* | Transport parameters of Air-Outside |
| *D20t* | Transport parameters of Freshwater-Outside |
| *D30t* | Transport parameters of Seawater-Outside |
| *Dij* | Transport parameters of phase *i* to phase *j* |
| *f* | Fugacity (Pa) |
| *fi,j* | Fugacity of phase *i* to phase *j* (Pa) |
| *Z* | Fugacity capacity [mol/(m3**·**Pa)] |
| *ZA* | Fugacity capacity of air [mol/(m3**·**Pa)] |
| *R* | Gas constant 8.314[(m3·Pa)/(K·mol)] |
| *T* | Temperature (K) |
| *ZAP* | Fugacity capacity of suspended particulate in air phase [mol**/(**m3**·**Pa)] |
| *PLS* | Vapor pressure of liquid (Pa) |
| *ZAB* | Fugacity capacity of air phase [mol/(m3**·**Pa)] |
| *ZW* | Fugacity capacity of water phase [mol/(m3**·**Pa)] |
| *ZPW* | Fugacity capacity of suspended particulate in water phase [mol/(m3·Pa)] [mol/(m3**·**Pa)] |
| *Zij* | Fugacity capacity of substance i in phase j [mol/(m3**·**Pa)], i = 1, 2, 3, 4, 5 and 6 represent air phase, fresh water phase, seawater phase, soil phase, sediment phase and groundwater phase, respectively, j = 1, 2 and 3 respectively represent air, water and particulate matter |
| *γPW* | Proportion of suspended particles in water phase |
| *γAP* | Proportion of suspended particles in air phase |
| *γsed* | The proportion of sediments in sediment phase |
| *γW* | The proportion of water in sediment phase |
| *H* | Henry's constant [(m3·Pa )/mol] |
| *ρ* | Density (kg/L) |
| *ρpw* | Particle density in water (kg/L) |
| *ρsed* | Density of sediments (kg/L) |
| *ρs* | Density of soils (kg/L) |
| *KOW* | Distribution coefficient of octanol and water |
| *KOC* | Distribution coefficient of organic carbon and water |
| *KGW-W* | Distribution coefficient of surface and groundwater |
| *foc,pw* | The fugacity of particulate matter in water (Pa) |
| *foc,s* | The fugacity of soil (Pa) |
| *foc,sed* | The fugacity of sediment (Pa) |
| *D0-a* | Transport parameters of Outside-Air |
| *Q0-a(t)* | Flux of Outside-Air |
| *D0-w* | Transport parameters of Outside-Freshwater |
| *Q0-w(t)* | Flux of Outside-Freshwater |
| *Za* | Fugacity capacity of adjacent air phase |
| *Zsw* | Fugacity capacity of adjacent freshwater phase |
| *T02* | Rate of pollutant emission into freshwater(mol/h) |
| *T04* | Rate of pollutant emission into soil(mol/h) |

**Table S10 Proportion of antibiotic excretion in humans and animals**(Zhang et al., 2015b)

| Antibiotics | Excretion ratio (%) | | | |
| --- | --- | --- | --- | --- |
| Human | Pig | | Poultry |
| Urine | Feces |
| OTC | 66.70 | 59.00 | 28.10 | 52.50 |
| TC | 57.90 | 52.50 | 25.00 | 52.50 |
| NOR | 0.00 | 21.00 | 19.20 | 53.00 |
| OFX | 75.80 | 27.80 | 25.50 | 53.00 |
| ETM | 35.00 | 12.60 | 18.20 | 67.00 |
| AMOX | 70.00 | 65.00 | 10.00 | 70.00 |

**Table S11 Consumption rate of human and animal antibiotics**(Zhang et al., 2015b)

| Antibiotics | Pig | Poultry | Human |
| --- | --- | --- | --- |
|  | (mol/h） | (mol/h) | (mol/h) |
| OTC | 1.12E-07 | 0 | 2.05E-10 |
| TC | 3.85E-06 | 7.71E-08 | 4.36E-07 |
| NOR | 2.14E-07 | 7.15E-09 | 2.97E-09 |
| OFX | 6.48E-07 | 1.49E-07 | 1.75E-09 |
| ETM | 0 | 6.53E-08 | 1.43E-07 |
| AMOX | 1.95E-06 | 1.12E-07 | 2.50E-09 |

**Table S12 Measurement data of antibiotic content in Yangtze River Estuary**

| Antibiotics | Concentration (ng/L) | Reference |
| --- | --- | --- |
| OTC in freshwater | 0.02 | (Zhang et al., 2014) |
| TC in freshwater | 7.14 | (Zhang et al., 2014) |
| NOR in freshwater | 4.69 | (Zhang et al., 2014) |
| OFX in freshwater | 5.79 | (Zhang et al., 2014) |
| ETM in freshwater | 6.4 | (Zhang et al., 2014) |
| AMOX in freshwater | 10.34 | (Zhang et al., 2014) |
| OTC in seawater | 0.01 | (Guo et al., 2018) |
| TC in seawater | 3.57 | (Guo et al., 2018) |
| NOR in seawater | 2.09 | (Guo et al., 2018) |
| OFX in seawater | 3.19 | (Guo et al., 2018) |
| ETM in seawater | 3.2 | (Guo et al., 2018) |
| AMOX in seawater | 2.2 | (Guo et al., 2018) |
| OTC in soil | 42 | (Ji et al., 2012) |
| TC in soil | 15 | (Ji et al., 2012) |
| NOR in soil | 4.8 | (Ji et al., 2012) |
| OFX in soil | 4.8 | (Ji et al., 2012) |
| ETM in soil | 4.4 | (Ji et al., 2012) |
| AMOX in soil | 6.7 | (Ji et al., 2012) |
| OTC in sediment | 0.28 | (Jiang et al., 2011) |
| TC in sediment | 1.18 | (Jiang et al., 2011) |
| NOR in sediment | 2.54 | (Jiang et al., 2011) |
| OFX in sediment | 12.7 | (Jiang et al., 2011) |
| ETM in sediment | 44 | (Jiang et al., 2011) |
| AMOX in sediment | 3 | (Jiang et al., 2011) |
| OTC in groundwater | 1 | (Ma et al., 2015) |
| TC in groundwater | 1 | (Ma et al., 2015) |
| NOR in groundwater | 0.5 | (Ma et al., 2015) |
| OFX in groundwater | 0.5 | (Ma et al., 2015) |
| ETM in groundwater | 14.3 | (Ma et al., 2015) |
| AMOX in groundwater | 0.9 | (Ma et al., 2015) |

**Table S13 Environmental parameter table for tidal stage**

| symbol | definition | Study area values | Reference |
| --- | --- | --- | --- |
| *A3* | Seawater area (m2) | 5.18E+09 | * |
| *A4* | Soil area (m2) | 5.77E+09 | * |
| *A6* | Groundwater area (m2) | 5.99E+09 | * |
| *h3* | depth of Seawater (m) | 7.00-8.32 | (Bintein and Devillers, 1996) |
| *h6* | depth of Groundwater (m) | 10 | (Bintein and Devillers, 1996) |

*Access to remote sensing image data (https://earthexplorer.usgs.gov)

**Reference**

Bintein, S., Devillers, J., 1996. Evaluating the environmental fate of atrazine in France. Chemosphere 32, 2441–2456. https://doi.org/10.1016/0045-6535(96)00145-2

Guo, X. pan, Liu, X., Niu, Z. shun, Lu, D. pei, Zhao, S., Sun, X. li, Wu, J. yuan, Chen, Y. ru, Tou, F. yun, Hou, L., Liu, M., Yang, Y., 2018. Seasonal and spatial distribution of antibiotic resistance genes in the sediments along the Yangtze Estuary, China. Environ. Pollut. 242, 576–584. https://doi.org/10.1016/j.envpol.2018.06.099

Ji, X., Shen, Q., Liu, F., Ma, J., Xu, G., Wang, Y., Wu, M., 2012. Antibiotic resistance gene abundances associated with antibiotics and heavy metals in animal manures and agricultural soils adjacent to feedlots in Shanghai; China. J. Hazard. Mater. 235–236, 178–185. https://doi.org/10.1016/j.jhazmat.2012.07.040

Jiang, L., Hu, X., Yin, D., Zhang, H., Yu, Z., 2011. Occurrence, distribution and seasonal variation of antibiotics in the Huangpu River, Shanghai, China. Chemosphere 82, 822–828. https://doi.org/10.1016/j.chemosphere.2010.11.028

Ma, Y., Li, M., Wu, M., Li, Z., Liu, X., 2015. Occurrences and regional distributions of 20 antibiotics in water bodies during groundwater recharge. Sci. Total Environ. 518–519, 498–506. https://doi.org/10.1016/j.scitotenv.2015.02.100

Zhang, Q., Zhao, J.L., Ying, G.G., Liu, Y.S., Pan, C.G., 2014. Emission estimation and multimedia fate modeling of seven steroids at the river basin scale in China. Environ. Sci. Technol. 48, 7982–7992. https://doi.org/10.1021/es501226h

Zhang, Q.Q., Ying, G.G., Chen, Z.F., Liu, Y.S., Liu, W.R., Zhao, J.L., 2015a. Multimedia fate modeling and risk assessment of a commonly used azole fungicide climbazole at the river basin scale in China. Sci. Total Environ. 520, 39–48. https://doi.org/10.1016/j.scitotenv.2015.03.038

Zhang, Q.Q., Ying, G.G., Pan, C.G., Liu, Y.S., Zhao, J.L., 2015b. Comprehensive evaluation of antibiotics emission and fate in the river basins of China: Source analysis, multimedia modeling, and linkage to bacterial resistance. Environ. Sci. Technol. 49, 6772–6782. https://doi.org/10.1021/ACS.EST.5B00729
